# Supplementary material
Source: HighWire-hosted journal article supplement (https://www.ijssurgery.com/content/16/5/802)

**Supplemental Figure 1.** Illustrative example of pedicle screw fixation within cadaveric vertebrae with dimensional measures. BH: Body height, BW: Body width, PH: Pedicle height, IA: Screw insertion angle, DPH: Distance to pedicle, AP: Anterior-posterior length of cement plume, Lat: Lateral width of cement plume, Dtp: Distance of screw tip to anterior plume, Dtd: Distance of screw tip to pedicle, Dtac: Distance to anterior cortex.

**Supplemental Figure 2.** Foam block testing of correlation between plume geometry and pull-out strength (nonsignificant variables).

**(a)** Correlation scatterplot between anterior/posterior (A/P) plume diameter, fenestrated screw design and cement type with pull-out strength (coefficient = 0.06, *P* = 0.73).


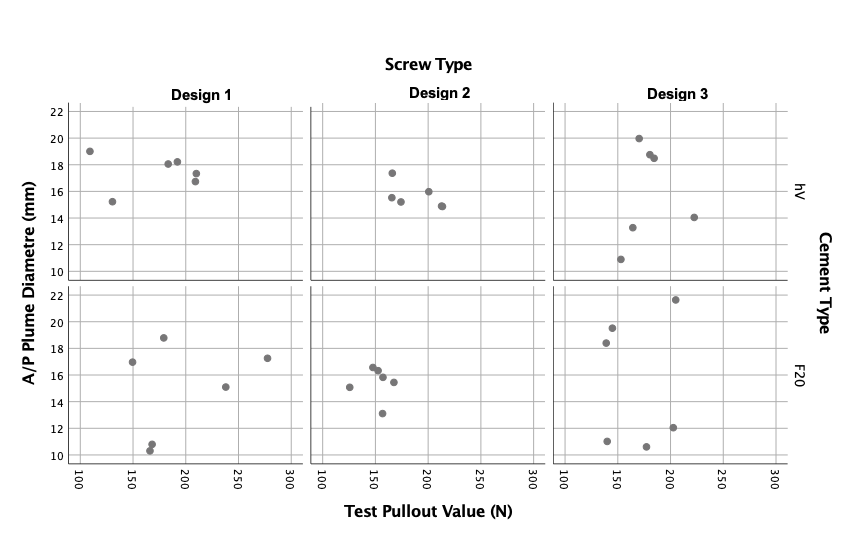


**(b)** Correlation scatterplot between plume distance from tip, fenestrated screw design and cement type with pull-out strength (coefficient = 0.126, *P* = 0.465).


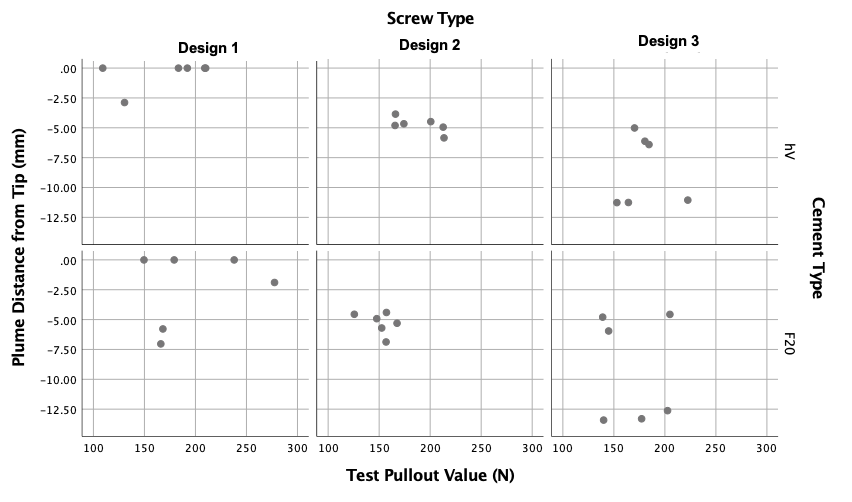


**(c)** Correlation scatterplot between plume distance from head, fenestrated screw design and cement type with pull-out strength (coefficient = 0.110, *P* = 0.522).


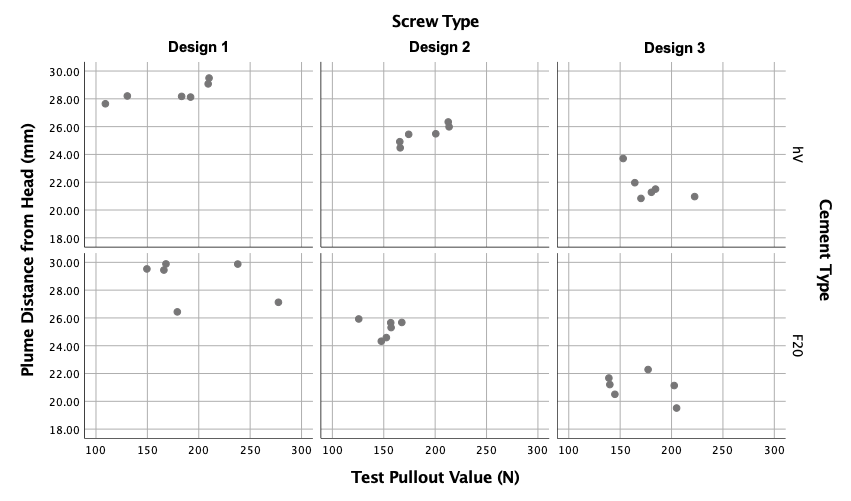


**Supplemental Figure 3**. Vertebral tests of correlation between plume geometry and pull-out strength (nonsignificant variables).

**(a)** Correlation between lateral plume diameter and pull-out strength (coefficient = -0.169, *P* = 0.323).


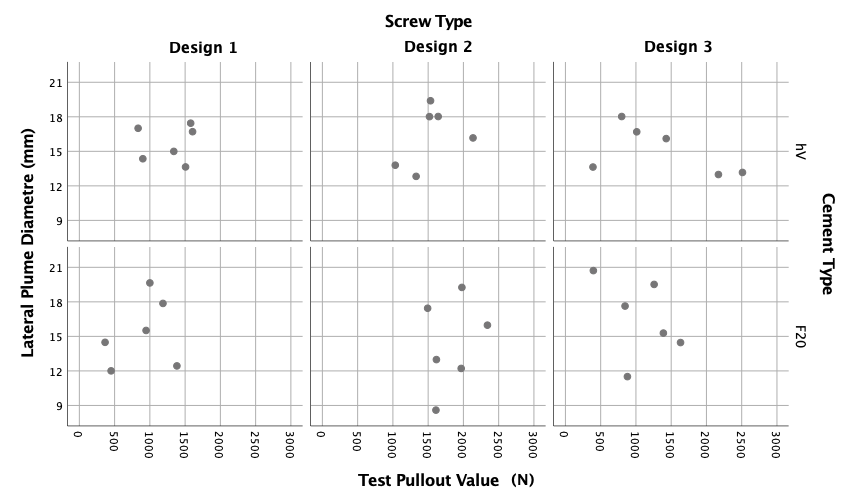


**(b)** Correlation between plume distance from head and pull-out strength (coefficient = 0.184, *P* = 0.283).


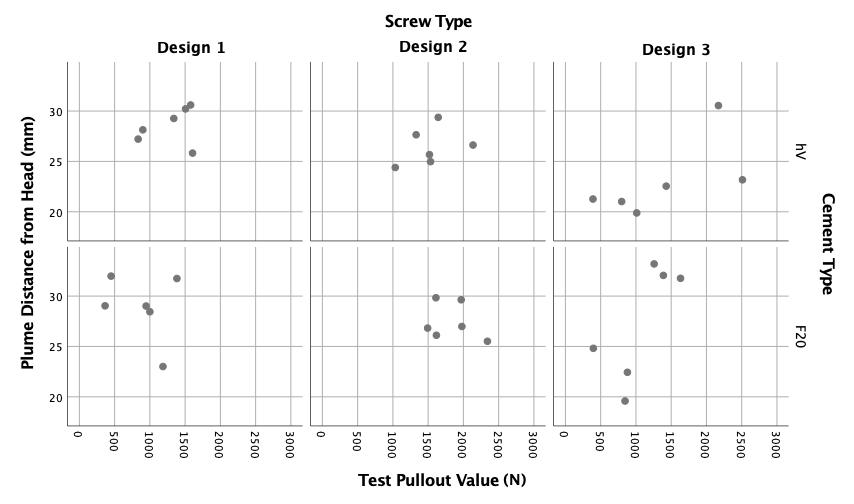


**(c)** Correlation between distance from tip to anterior cortex and pull-out (coefficient = 0.130, *P* = 0.449).


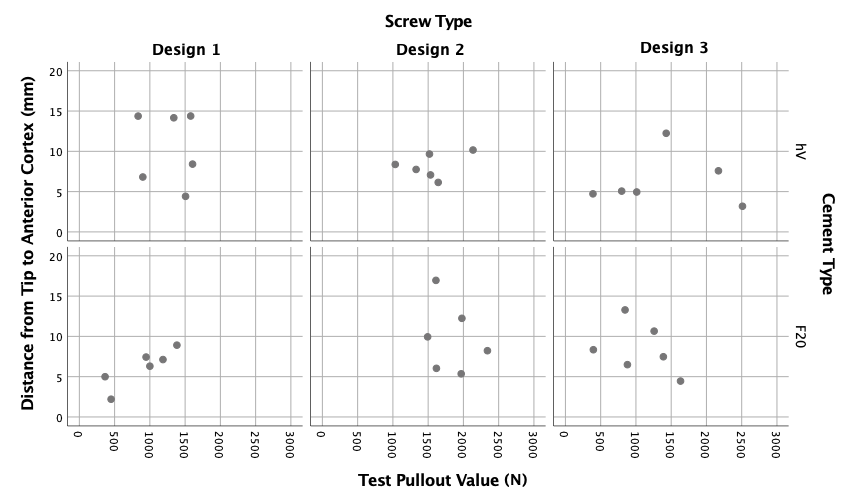


**(d)** Correlation between distance from tip of screw to pedicle and pull-out strength (coefficient = 0.115, *P* = 0.505).


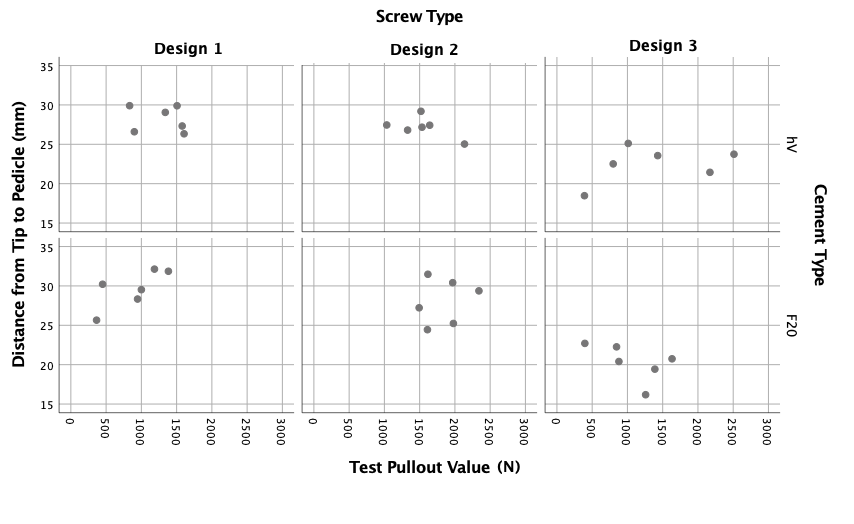


**(e)** Correlation between body height and pull-out strength (coefficient = 0.310, *P* = 0.066).
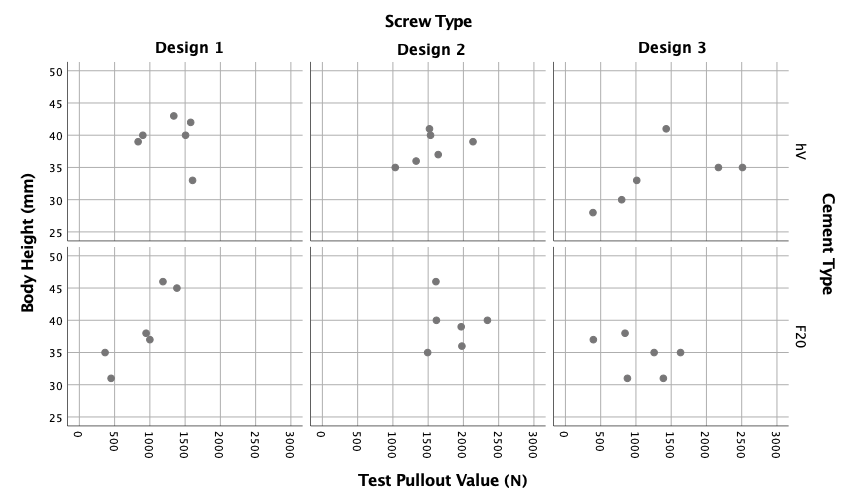


**(f)** Correlation between bone density and pull-out strength (coefficient = 0.021, *P* = 0.905).
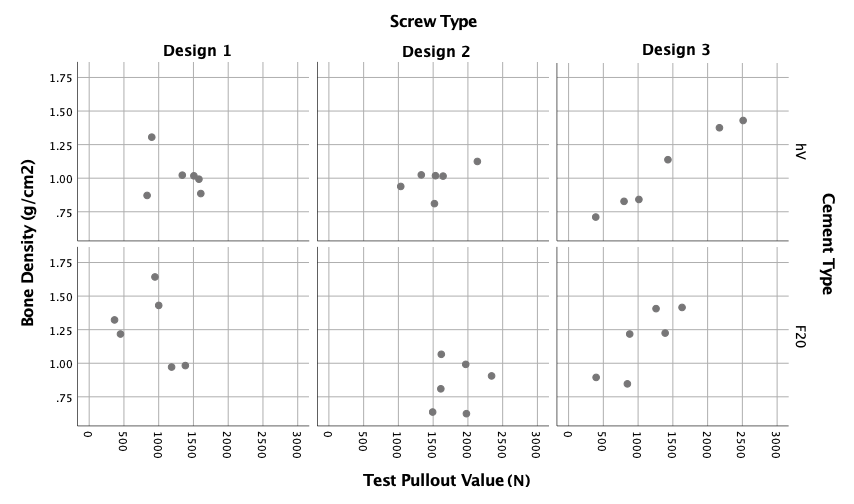


**(g)** Correlation between pedicle height and pull-out strength (coefficient = 0.21, *P* = 0.219).
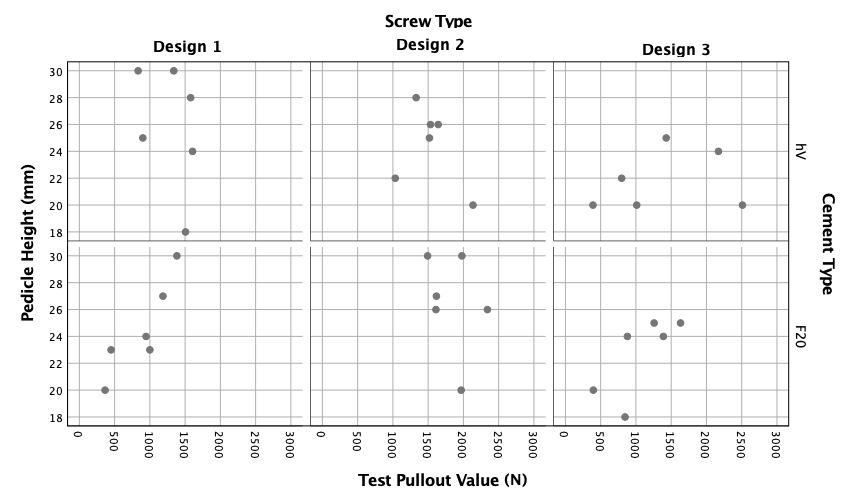

Supplement: inline-supplementary-material-1 [file inline-supplementary-material-1.docx]
